# Supplementary material for: MOET: a web-based gene set enrichment tool at the Rat Genome Database for multiontology and multispecies analyses
Source: Genetics. 2022 Jan 28;220(4):iyac005. doi: 10.1093/genetics/iyac005 (PMC8982048; doi:10.1093/genetics/iyac005)
Supplement: iyac005_Supplementary_Figure_2 [file iyac005_supplementary_figure_2.pdf]

# Supplementary Figure 2

A

Rattus norvegicus (Rat)

A1

Diseases  
Obesity/Metabolic Syndrome

Mammalian Phenotype  
Obesity/Metabolic Syndrome

Human Phenotype  
Obesity/Metabolic Syndrome

Biological Processes  
Obesity/Metabolic Syndrome

Pathways  
Obesity/Metabolic Syndrome

Vertebrate Traits  
Obesity/Metabolic Syndrome

Clinical Measurements  
Obesity/Metabolic Syndrome

Experimental Conditions  
Obesity/Metabolic Syndrome

Chemicals and Drugs  
Obesity/Metabolic Syndrome

A2

Rat  
Genes: 202  
QTL: 75  
Strains: 20

Mouse  
Genes: 203  
QTL: 0

Human  
Genes: 212  
QTL: 53

Chinchilla  
Genes: 187  
QTL: 0

Bonobo  
Genes: 193  
QTL: 0

Dog  
Genes: 195  
QTL: 0

Squirrel  
Genes: 189  
QTL: 0

Pig  
Genes: 191  
QTL: 0

Select a term

<< Back

familial hyperlipidemia (D0ID:1168)

Parent Terms

Term With Siblings

Child Terms

Dyslipidemias  
lipid metabolism disorder

familial hyperlipidemia  
Conditions with excess LIPIDS in the blood  
Glycosylphosphatidylinositol Deficiency  
Hepatic Lipase Deficiency  
Hypertriglyceridemia, Transient Infantile

familial chylomicronemia syndrome  
familial combined hyperlipidemia  
familial hypercholesterolemia  
glycogen storage disease IX  
Hypercholesterolemia

Figure S2A: You can access MOET from individual disease portal pages from the ‘Diseases’ or ‘Disease Portals’ menu on the RGD front page. (S2A1) Default selection is ‘Diseases’ but you can select other ontologies by clicking on them. (S2A2) Similarly, other species can be selected by a single click. (S2A3) You can find the disease-related term from the term browser with its definition below it.

Obesity/Metabolic Syndrome AND familial hyperlipidemia

B

Genes: 202

QTL: 75

Strains: 20

Abca1  
Abcb11  
Abcb1a  
Abcc6  
Abcg5  
Abcg8  
Acat2  
Acot1  
Acp1  
Add1  
Adipoq  
Adrb2  
Adrb3  
Ahsg  
Akt1  
Alb  
Apl  
Angptl3  
Angptl4  
Apc

Httb8  
Niddm57  
Scd1  
Scd11  
Scd12  
Scd13  
Scd14  
Scd15  
Scd16  
Scd17  
Scd18  
Scd19  
Scd2  
Scd22  
Scd23  
Scd25  
Scd26  
Scd27  
Scd28  
Scd29

Exhc/Seac  
Fhh-Ar4g<sup>mt/Mow</sup>  
HTG  
LA-op/NJcr  
LEW/OlaHsd  
LH/Mav  
SD-Ldfr<sup>mt1</sup>  
SD-Ldfr<sup>mt1</sup>Sage  
SD-Ldfr<sup>mt1</sup>Sage-/-  
SDT-Cg-Lep<sup>mt1</sup>Jatt  
SHR-Tg(PEPCK-SREBF1)2lpcv  
SHRSP-ZUC-(D5Rat4-D5Rat36)1zmDmcr  
SR/Hsd  
SS-Tg(ApoC3-CETP)25Opaz  
SS-Tg(ApoC3-CETP)53Opaz  
SS/Hsd  
SS/JrHsdMcow  
SS-ZUC-Lep<sup>mt1</sup>

Figure S2B: The number of genes, QTL and strains annotated to your selected term are displayed and can be downloaded.

Gene Set Enrichment

C

DO: Diseases Ontology  
Enrichment

PW: Pathway Ontology  
Enrichment

MP: Phenotype Ontology  
Enrichment

GO: Biological Process  
Enrichment

GO: Cellular Component  
Enrichment

GO: Molecular Function  
Enrichment

CHEBI: Chemical/Drug  
Enrichment

Chemical Interactions Ontology

Download Result Set

| Term                                                                       | Annotated Genes | Ref Genes | p value  | Bonferroni Correction | Odds Ratio |
|----------------------------------------------------------------------------|-----------------|-----------|----------|-----------------------|------------|
| unsaturated fatty acid (CHEBI:27208)                                       | 91              | 952       | 1.67E-66 | 1.44E-62              | 18.519642  |
| Daphnia galeata metabolite (CHEBI:83038)                                   | 82              | 711       | 8.85E-66 | 7.64E-62              | 21.331642  |
| olefinic fatty acid (CHEBI:53339)                                          | 79              | 645       | 3.30E-65 | 2.85E-61              | 22.336847  |
| bezafibrate (CHEBI:47612)                                                  | 52              | 218       | 1.28E-57 | 1.11E-53              | 41.718437  |
| lovastatin (CHEBI:40303)                                                   | 76              | 720       | 1.46E-57 | 1.26E-53              | 18.346096  |
| mevastatin (CHEBI:34848)                                                   | 76              | 724       | 2.22E-57 | 1.92E-53              | 18.229002  |
| statin (naturally occurring) (CHEBI:87632)                                 | 76              | 724       | 2.22E-57 | 1.92E-53              | 18.229002  |
| pyranones (CHEBI:75885)                                                    | 77              | 755       | 2.98E-57 | 2.57E-53              | 17.769375  |
| monounsaturated fatty acid (CHEBI:25413)                                   | 64              | 452       | 4.95E-56 | 4.27E-52              | 23.661486  |
| pyrans (CHEBI:26407)                                                       | 88              | 1145      | 7.36E-56 | 6.35E-52              | 14.042006  |
| EC 3.4.24.83 (anthrax lethal factor endopeptidase) inhibitor (CHEBI:77255) | 78              | 827       | 1.86E-55 | 1.61E-51              | 16.368025  |
| simvastatin                                                                | 69              | 579       | 1.90E-55 | 1.64E-51              | 20.03192   |

Gene Enrichment

Zoom

No of genes

p value

Gene Count

0 50 100 150 200

0 0.01 0.02 0.03 0.04 0.05

Figure S2C: MOET is integrated with individual disease portal pages and is at the bottom on individual pages. You can interchangeably perform MOET analysis for different ontologies that you selected from the ontology tabs below the ‘Gene Set Enrichment’ option, annotated to the list of input genes. The results shown here are for the list of ChEBI ontology terms annotated to the input gene list. You can select other ontologies or species from the top of the same page as well.
